# Supplementary material
Source: Royal Society of Chemistry journal article supplement (doi:10.1039/d6tb00108d)
Supplement: d6tb00108d1.pdf [file d6tb00108d1.pdf]

## Supporting Information

### Embedding Near-Infrared Fluorescent Single-Walled Carbon Nanotubes Within Freeform Fabricated Hydrogels via Continuous Digital Light Processing

Alexander Boltinhouse<sup>1‡</sup>, S M Abu Naser Shovon<sup>2‡</sup>, Saroj Subedi<sup>2</sup>, Hussain Kawsar Chowdhury<sup>1</sup>, Henry Oliver Tenadooah Ware<sup>2\*</sup>, and Januka Budhathoki-Uprety<sup>1\*</sup>

<sup>1</sup>Department of Textile Engineering, Chemistry and Science,

<sup>2</sup>Department of Mechanical and Aerospace Engineering,  
North Carolina State University, Raleigh, NC, 27695, United States

‡These authors contributed equally.

#### Corresponding Authors

\*jbudhat@ncsu.edu. \* howare@ncsu.edu.

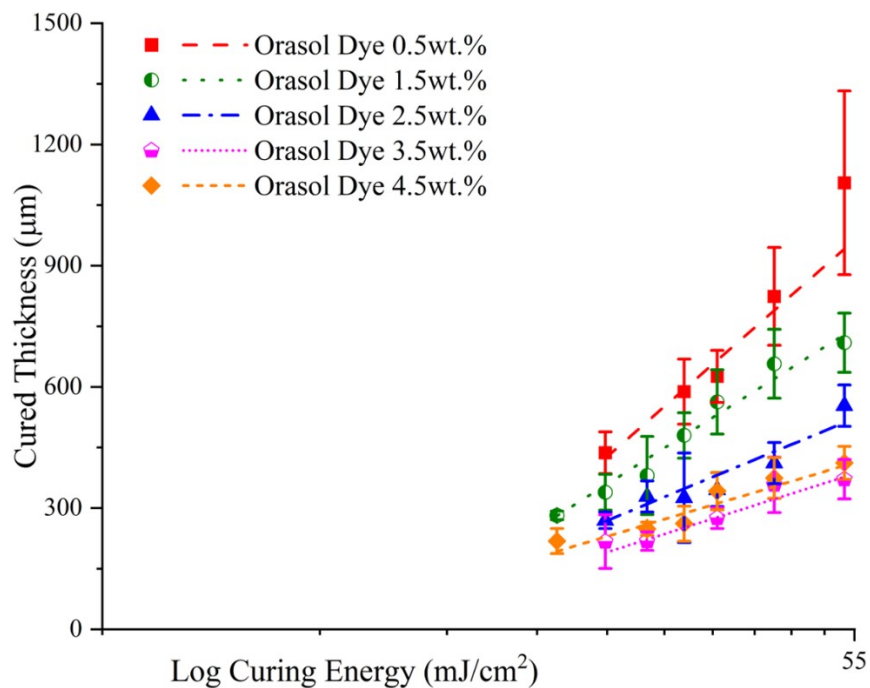

Figure S1: Hydrogel Curing Curve with different wt.% of Orasol Dye.

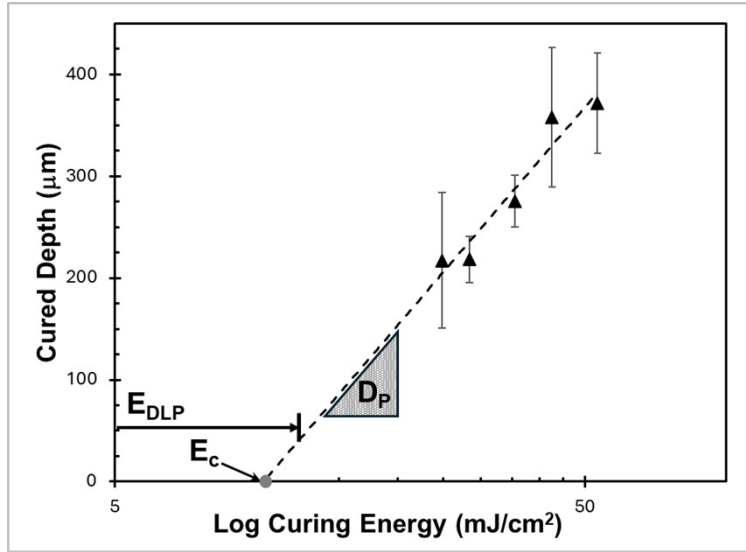

**Figure S2:** A representative Curing Curve with Hydrogel 36-40 formulation to show the procedure of estimating the depth of penetration ( $D_p$ ) and the critical energy ( $E_c$ ).

**Table S1:** Curing Parameters with the variation of Orasol Dye Concentration at 36-40 hydrogel formulation. The gray highlighted row was used in the remaining hydrogel formulations.

| Orasol Dye Concentration in 36-40 Hydrogel | Curing Parameters        |                                |
|--------------------------------------------|--------------------------|--------------------------------|
|                                            | Critical Energy, $E_c$   | Light Penetration Depth, $D_p$ |
| 0.5 wt.%                                   | 16.01 mJ/cm <sup>2</sup> | 872.58 μm                      |
| 1.5 wt.%                                   | 12.53 mJ/cm <sup>2</sup> | 510.65 μm                      |
| 2.5 wt.%                                   | 11.80 mJ/cm <sup>2</sup> | 343.35 μm                      |
| 3.5 wt.%                                   | 10.35 mJ/cm <sup>2</sup> | 233.51 μm                      |
| 4.5 wt.%                                   | 9.00 mJ/cm <sup>2</sup>  | 232.99 μm                      |

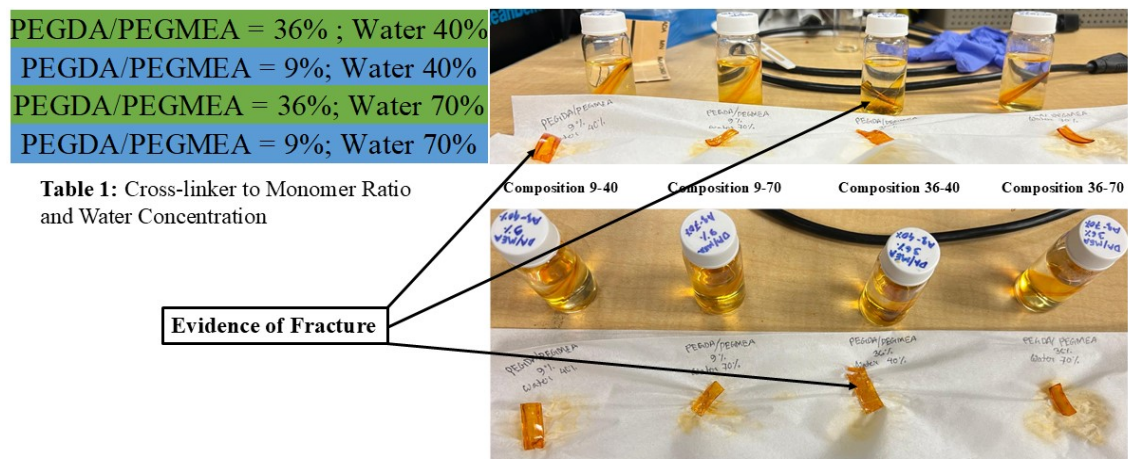

**Figure S3:** Durability Experiments and evidence of fracture in both hydrated and dehydrated conditions with composition 36-40 and 9-40 neat hydrogel.

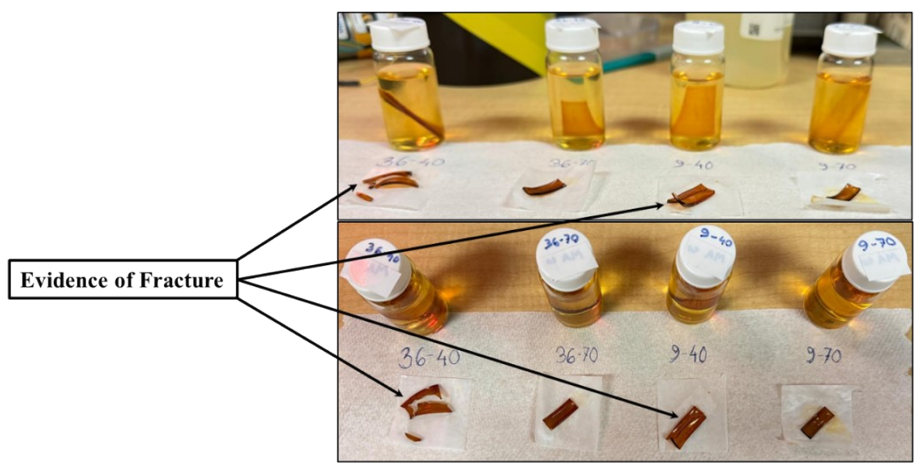

**Figure S4:** Durability Experiments and evidence of fracture in hydrated conditions after switching with 36-40 and 9-40 SWCNT-infused hydrogel.

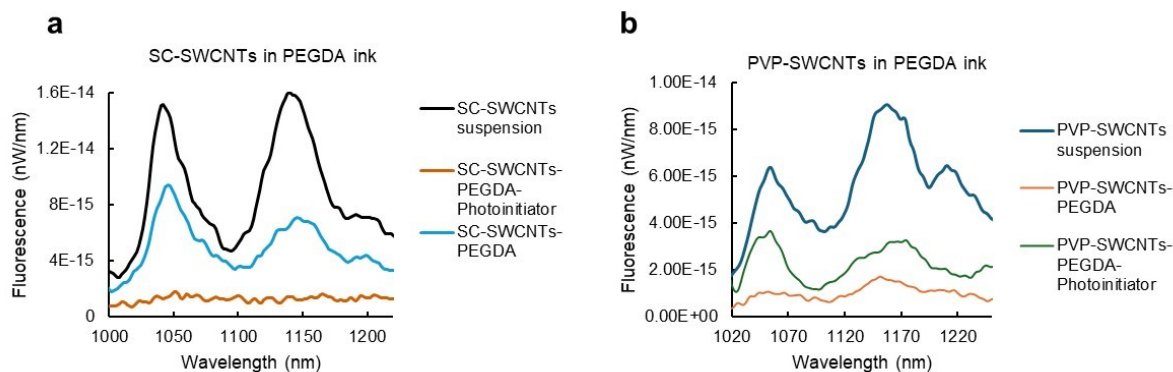

**Figure S5.** Fluorescence measurements on SWCNT suspensions with PEGDA and photoinitiator; a) SC-SWCNTs suspension and the mixture after steps for formulation of PEGDA-based ink (addition of crosslinker and photoinitiator); b) PVP-SWCNTs suspension and the mixture after steps for formulation of PEGDA-based ink (addition of crosslinker and photoinitiator).

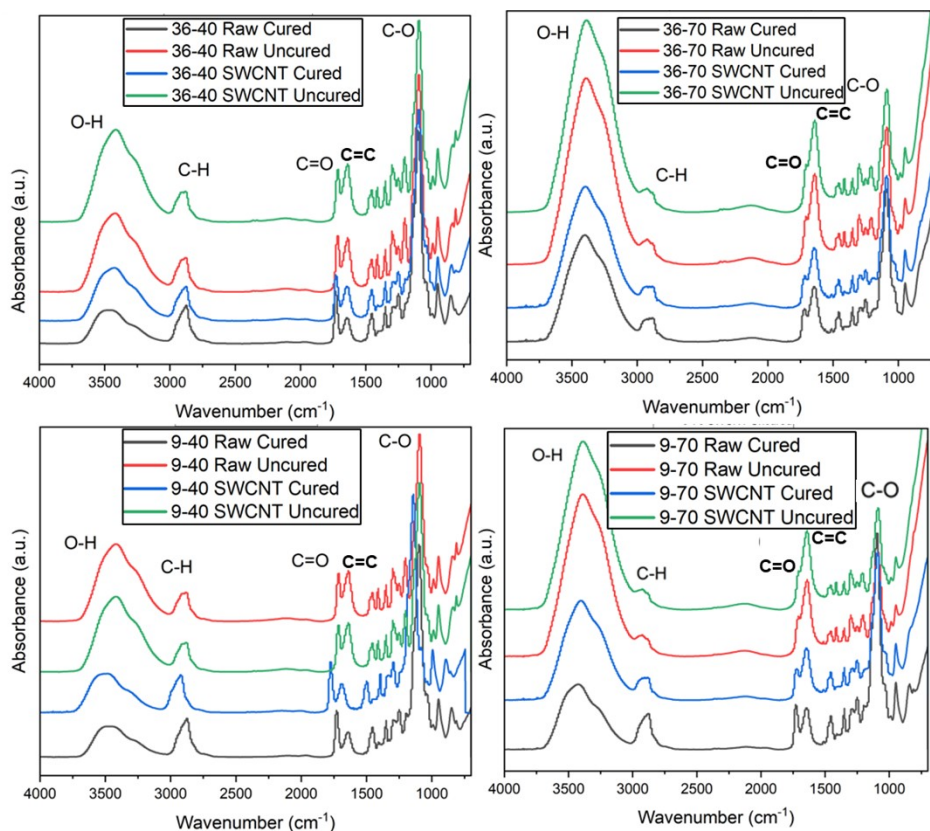

**Figure S6:** FTIR characterization plots of all Hydrogel formulations, Neat (denoted here as “Raw”) and SWCNT-infused (denoted here as “SWCNT”). Tested samples included the uncured liquid ink (denoted here as “Uncured”) and solid cured samples (denoted here as “Cured”).

**Table S2:** Reduction of C=C (~1638 cm<sup>-1</sup>) within the utilized hydrogel formulations due to curing of all Hydrogel Formulations.

| Formulation          | Reduction in C=C Absorption (%) |
|----------------------|---------------------------------|
| Hydrogel 36-40 Neat  | 51.55                           |
| Hydrogel 36-40 SWCNT | 43.41                           |
| Hydrogel 36-70 Neat  | 41.89                           |
| Hydrogel 36-70 SWCNT | 34.00                           |
| Hydrogel 9-40 Neat   | 54.49                           |
| Hydrogel 9-40 SWCNT  | 45.30                           |
| Hydrogel 9-70 Neat   | 44.92                           |
| Hydrogel 9-70 SWCNT  | 34.99                           |
